# Supplementary material
Source: publisher figshare collection journal article supplement (https://acs.figshare.com/ndownloader/files/4186711)

jf-2011-02773y

## Supplementary information

The involvement of pachybasin and emodin in self-regulation of *Trichoderma*

*harzianum* mycoparasitic coiling

## Supplementary Figure Legends

Figure S1. Effects of pachybasin and emodin on the mycelial growth and colony morphology of *T. harzianum* and *R. solani*. Mycelial plugs of (A) *T. harzianum* or (B) *R. solani* were grown on PDA for 5 days or 7 days, respectively.

Figure S2. Effects of the exogenous applied of pachybasin and emodin in *T. harzianum* or during *T. harzianum* pre-contact with *R. solani* on coiling of *T. harzianum* around the Nylon 66 fiber. Microscopic analyses are showing mycoparasitic coiling in the interaction zone of the exogenous of 1 % DMSO (A), pachybasin (B) and emodin (C) in *T. harzianum* or during *T. harzianum* pre-contact with *R. solani* (D).

Figure S3. Effects of the exogenous applied of pachybasin and emodin in *T. harzianum* on mycoparasitic coiling of *T. harzianum* around the *R. solani*. Microscopic analyses are showing mycoparasitic coiling in the confrontation zone of

the exogenous applied of 1 % DMSO (A and D), pachybasin (B and E) and emodin (C and F) in *T. harzianum* during 2 and 8 h after meet.

Figure S4. Effects of the exogenous applied of pachybasin and emodin in *R. solani* on mycoparasitic coiling of *T. harzianum* around the *R. solani*. Microscopic analyses are showing mycoparasitic coiling in the confrontation zone of the exogenous applied of 1 % DMSO (A and D), pachybasin (B and E) and emodin (C and F) in *R. solani* during 2 and 8 h after meet.

Figure S1

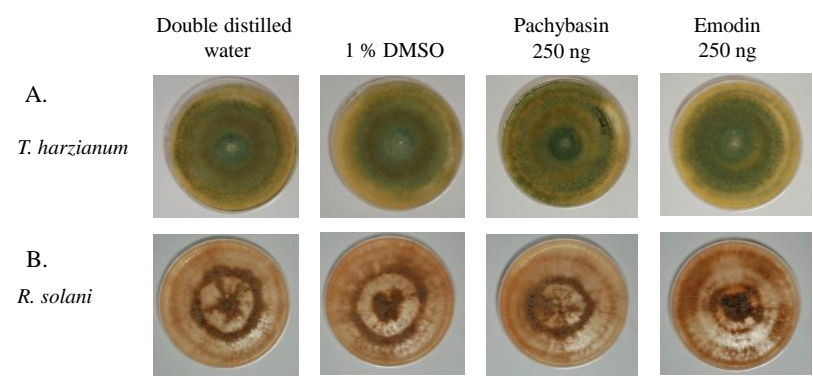

Figure S2

A. 1 % DMSO

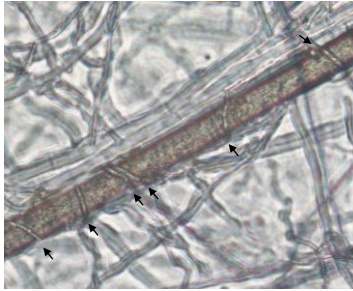

B. Pachybasin 250 ng

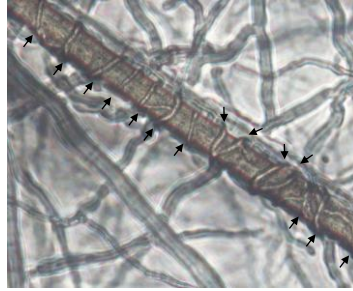

C. Emodin 250 ng

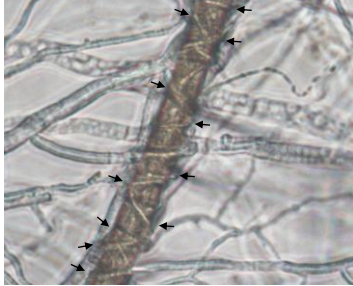

D. *T. harzianum* pre-contact with *R. solani*

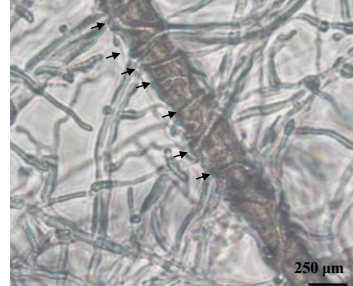

Figure S3

A. 1 % DMSO, 2 h

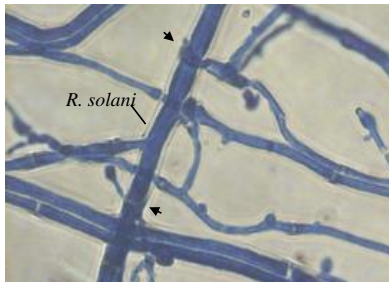

D. 1 % DMSO, 8h

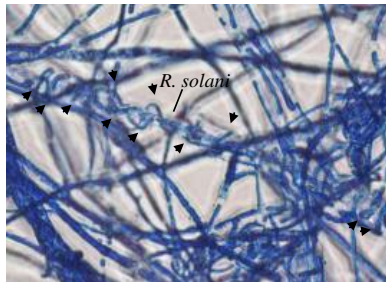

B. Pachybasin 250 ng, 2 h

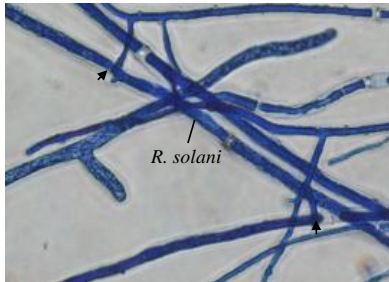

E. Pachybasin 250 ng, 8 h

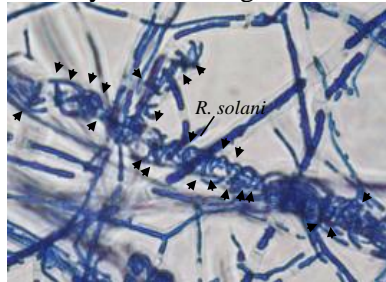

C. Emodin 250 ng, 2h

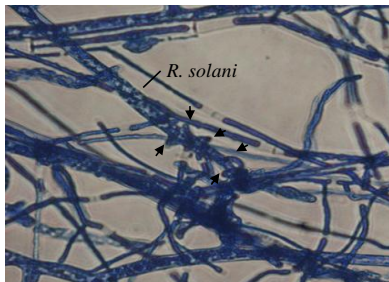

F. Emodin 250 ng, 8 h

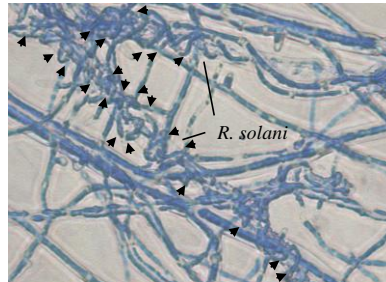

250  $\mu$ m

Figure S4

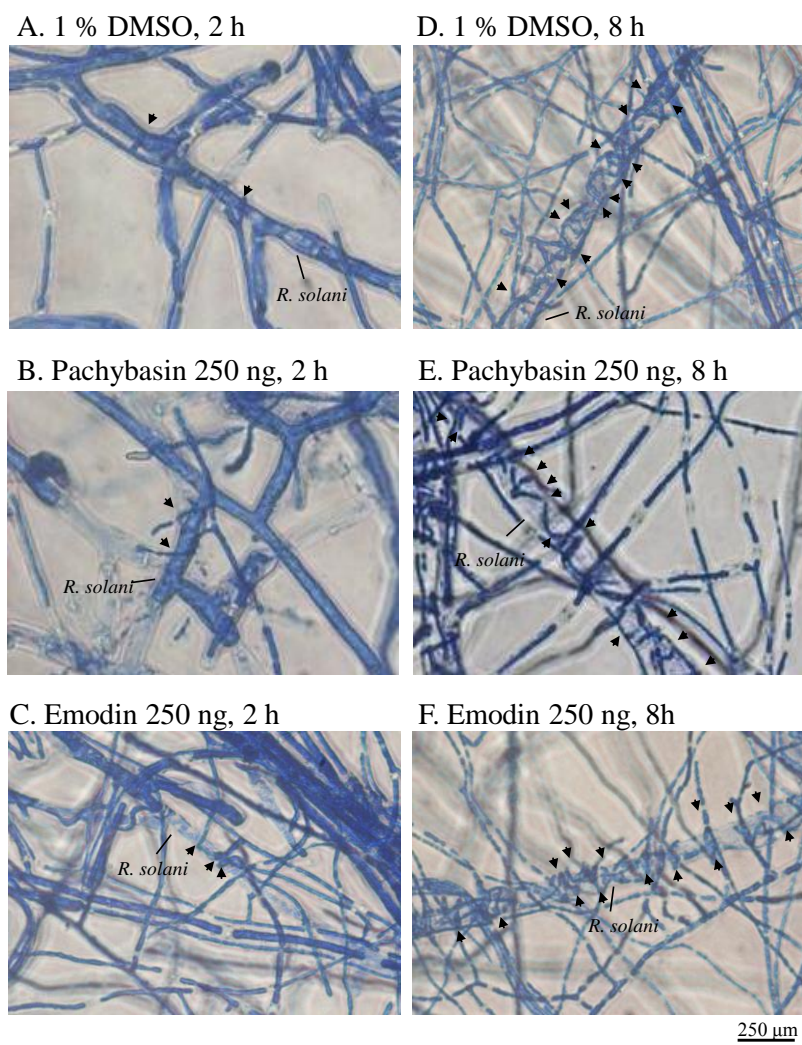

Supplement: Supplementary file 1 [file 4186711]
